# Supplementary material for: Sourdough “Biga” Fermentation Improves the Digestibility of Pizza Pinsa Romana: An Investigation through a Simulated Static In Vitro Model
Source: MDPI journal article supplement (doi:10.3390/nu15132958), 2023-06-29
Supplement: s1 [file s1]

**Table S1.** List and description of biga and Pinsa Romana used in this study.

| BIGA                      |                                                                                                             |          |                 | PINSA ROMANA     |                                                                                                                                                  |
|---------------------------|-------------------------------------------------------------------------------------------------------------|----------|-----------------|------------------|--------------------------------------------------------------------------------------------------------------------------------------------------|
| Code                      | Conditions                                                                                                  | N        | Type of process | Code             |                                                                                                                                                  |
| <b>B_24</b>               | Ingredients: flour (wheat, rice, and soy), water, baker's yeast.<br>Fermentation, 24 h at 16 °C.            | <b>1</b> | Indirect        | <b>PR_24</b>     | Ingredients: B_24, water, baker's yeast, olive oil, and salt. Leavened for 2 h at 24 °C; 1.5 h processing and resting.                           |
| <b>B_48<sub>(1)</sub></b> | Ingredients: flour (wheat, rice, and soy), water, baker's yeast.<br>Fermentation, 48 h at 16 °C.            | <b>2</b> | Indirect        | <b>PR_48</b>     | Ingredients: B_48 <sub>(1)</sub> , water, baker's yeast, olive oil, and salt. Leavened for 2 h at 24 °C; 1.5 h processing and resting.           |
| <b>B_48<sub>(2)</sub></b> | Ingredients: flour (wheat, rice, and soy), water, baker's yeast.<br>Fermentation, 48 h at 16 °C.            | <b>3</b> | Indirect        | <b>PR_48+SD</b>  | Ingredients: B_48 <sub>(2)</sub> , water, sourdough, baker's yeast, olive oil and salt. Leavened for 2 h at 24 °C; 1.5 h processing and resting. |
| <b>B_48(SD)</b>           | Ingredients: flour (wheat, rice, and soy), water, sourdough, baker's yeast.<br>Fermentation, 48 h at 16 °C. | <b>4</b> | Indirect        | <b>PR_48(SD)</b> | Ingredients: B_48(SD), water, baker's yeast, olive oil, and salt. Leavened for 2 h at 24 °C; 1.5 h processing and resting.                       |
| <b>B_72</b>               | Ingredients: flour (wheat, rice, and soy), water, baker's yeast.<br>Fermentation, 72 h at 16 °C.            | <b>5</b> | Indirect        | <b>PR_72</b>     | Ingredients: B_72, water, baker's yeast, olive oil, and salt. Leavened for 2 h at 24 °C; 1.5 h processing and resting.                           |
| <b>-</b>                  | <b>-</b>                                                                                                    | <b>6</b> | Direct          | <b>PR_RT</b>     | Ingredients: flour (wheat, rice and soy), water, baker's yeast, olive oil and salt. Leavened for 2 h at 24 °C; 1.5 h processing and resting.     |

B\_48<sub>(1)</sub> and B\_48<sub>(2)</sub> biga have the same fermentation conditions and kind of raw ingredients, while they differ only for the percentage (weight/final weight) of each raw ingredient (see Table 1).

**Table S2.** Characterization of biga and sourdough.

|                     | pH          | LAB (Log CFU/g) | Yeast (Log CFU/g) |
|---------------------|-------------|-----------------|-------------------|
| B_24                | 5.48 ± 0.04 | 6.40 ± 0.21     | 7.72 ± 0.14       |
| B_48 <sub>(1)</sub> | 5.41 ± 0.02 | 6.35 ± 0.17     | 8.00 ± 0.02       |
| B_48 <sub>(2)</sub> | 5.42 ± 0.01 | 6.20 ± 0.25     | 7.93 ± 0.02       |
| B_48(SD)            | 3.94 ± 0.01 | 8.89 ± 0.13     | 7.22 ± 0.17       |
| B_72                | 5.55 ± 0.04 | 7.91 ± 0.06     | 7.04 ± 0.02       |
| CT_D                | 5.42 ± 0.02 | < 5             | 8.04 ± 0.04       |
| SD                  | 3.78 ± 0.03 | 8.06 ± 0.01     | 7.33 ± 0.13       |

The data are the means of three independent analysis ± standard deviations (n =3). SD, sourdough; B\_24, biga fermented for 24 h with baker's yeast; B\_48<sub>(1)</sub>, biga fermented 48 h with baker's yeast; B\_48<sub>(2)</sub>, biga fermented 48 h with baker's yeast; B\_48(SD), biga fermented for 48 h with baker's yeast and sourdough; B\_72, biga fermented for 72 h with baker's yeast; CT\_D, control dough made without biga and sourdough.

**Table S3.** Free amino acids profile of Pinsa Romana before (mg/kg) and after (mg/L) digestion.

|      | Pinsa Romana               |                            |                            |                           |                           |                           |
|------|----------------------------|----------------------------|----------------------------|---------------------------|---------------------------|---------------------------|
|      | PR_24                      | PR_48                      | PR_48(SD)                  | PR_48+SD                  | PR_72                     | PR_RT                     |
| Asp  | 14.35 ± 0.21 <sup>d</sup>  | 13.43 ± 0.20 <sup>d</sup>  | 95.45 ± 1.41 <sup>a</sup>  | 39.09 ± 0.58 <sup>c</sup> | 57.23 ± 0.84 <sup>b</sup> | 13.82 ± 0.20 <sup>d</sup> |
| Thr  | 4.76 ± 0.13 <sup>c</sup>   | 4.16 ± 0.11 <sup>d</sup>   | 4.71 ± 0.13 <sup>c</sup>   | 4.35 ± 0.12 <sup>cd</sup> | 7.87 ± 0.21 <sup>b</sup>  | 10.11 ± 0.27 <sup>a</sup> |
| Ser  | 3.12 ± 0.08 <sup>d</sup>   | 2.06 ± 0.05 <sup>e</sup>   | 12.56 ± 0.31 <sup>a</sup>  | 3.79 ± 0.09 <sup>c</sup>  | 3.98 ± 0.10 <sup>c</sup>  | 7.66 ± 0.19 <sup>b</sup>  |
| Glu  | 18.93 ± 0.64 <sup>d</sup>  | 13.32 ± 0.45 <sup>e</sup>  | 69.43 ± 2.34 <sup>a</sup>  | 31.05 ± 1.05 <sup>b</sup> | 24.55 ± 0.83 <sup>c</sup> | 19.83 ± 0.67 <sup>d</sup> |
| Gly  | 12.86 ± 0.29 <sup>b</sup>  | 10.46 ± 0.24 <sup>c</sup>  | 1.10 ± 0.03 <sup>d</sup>   | 12.40 ± 0.28 <sup>b</sup> | 22.80 ± 0.52 <sup>a</sup> | 22.83 ± 0.52 <sup>a</sup> |
| Ala  | 10.95 ± 0.24 <sup>f</sup>  | 13.6 ± 0.30 <sup>e</sup>   | 19.56 ± 0.43 <sup>c</sup>  | 16.07 ± 0.35 <sup>d</sup> | 27.95 ± 0.62 <sup>b</sup> | 31.41 ± 0.69 <sup>a</sup> |
| Val  | 11.03 ± 0.30 <sup>de</sup> | 10.04 ± 0.27 <sup>e</sup>  | 21.85 ± 0.59 <sup>a</sup>  | 11.95 ± 0.32 <sup>d</sup> | 19.20 ± 0.52 <sup>b</sup> | 14.79 ± 0.40 <sup>c</sup> |
| Cys  | 24.36 ± 0.99 <sup>a</sup>  | 20.30 ± 0.83 <sup>bc</sup> | 21.27 ± 0.87 <sup>bc</sup> | 19.00 ± 0.77 <sup>c</sup> | 21.49 ± 0.88 <sup>b</sup> | 25.01 ± 1.02 <sup>a</sup> |
| Met  | 4.46 ± 0.15 <sup>d</sup>   | 4.02 ± 0.14 <sup>d</sup>   | 8.80 ± 0.30 <sup>a</sup>   | 5.58 ± 0.19 <sup>c</sup>  | 6.24 ± 0.21 <sup>b</sup>  | 2.47 ± 0.08 <sup>e</sup>  |
| Ile  | 10.92 ± 0.31 <sup>d</sup>  | 10.34 ± 0.30 <sup>d</sup>  | 17.80 ± 0.51 <sup>a</sup>  | 12.54 ± 0.36 <sup>c</sup> | 14.48 ± 0.42 <sup>b</sup> | 11.02 ± 0.32 <sup>d</sup> |
| Leu  | 2.38 ± 0.08 <sup>d</sup>   | 1.86 ± 0.06 <sup>d</sup>   | 37.28 ± 1.28 <sup>a</sup>  | 5.94 ± 0.20 <sup>c</sup>  | 12.83 ± 0.44 <sup>b</sup> | 2.41 ± 0.08 <sup>d</sup>  |
| Tyr  | 1.67 ± 0.07 <sup>e</sup>   | 0.90 ± 0.04 <sup>e</sup>   | 21.72 ± 0.87 <sup>a</sup>  | 10.53 ± 0.42 <sup>c</sup> | 19.18 ± 0.77 <sup>b</sup> | 5.31 ± 0.21 <sup>d</sup>  |
| Phe  | 1.50 ± 0.06 <sup>d</sup>   | 1.39 ± 0.06 <sup>d</sup>   | 28.25 ± 1.13 <sup>a</sup>  | 6.13 ± 0.25 <sup>c</sup>  | 14.40 ± 0.58 <sup>b</sup> | 2.72 ± 0.11 <sup>d</sup>  |
| GABA | 7.53 ± 0.11 <sup>e</sup>   | 4.58 ± 0.07 <sup>f</sup>   | 66.92 ± 0.97 <sup>a</sup>  | 45.65 ± 0.66 <sup>c</sup> | 59.67 ± 0.87 <sup>b</sup> | 32.87 ± 0.48 <sup>d</sup> |
| Orn  | 2.53 ± 0.08 <sup>c</sup>   | 3.46 ± 0.11 <sup>b</sup>   | 3.93 ± 0.13 <sup>a</sup>   | 3.92 ± 0.13 <sup>a</sup>  | 3.49 ± 0.12 <sup>b</sup>  | 0.53 ± 0.02 <sup>d</sup>  |
| Lys  | 7.33 ± 0.18 <sup>c</sup>   | 4.25 ± 0.11 <sup>e</sup>   | 5.01 ± 0.13 <sup>d</sup>   | 4.49 ± 0.11 <sup>de</sup> | 10.02 ± 0.25 <sup>b</sup> | 12.34 ± 0.31 <sup>a</sup> |

**Table S3. Cont.**

|                           | PR_24                      | PR_48                      | PR_48(SD)                   | PR_48+SD                   | PR_72                       | PR_RT                      |
|---------------------------|----------------------------|----------------------------|-----------------------------|----------------------------|-----------------------------|----------------------------|
| His                       | 1.15 ± 0.03 <sup>c</sup>   | 1.64 ± 0.05 <sup>b</sup>   | 1.22 ± 0.04 <sup>c</sup>    | 1.19 ± 0.04 <sup>c</sup>   | 2.05 ± 0.06 <sup>a</sup>    | 1.58 ± 0.05 <sup>b</sup>   |
| Trp                       | 0.29 ± 0.01 <sup>d</sup>   | 0.02 ± 0.01 <sup>d</sup>   | 26.88 ± 1.02 <sup>a</sup>   | 10.59 ± 0.40 <sup>c</sup>  | 20.56 ± 0.78 <sup>b</sup>   | 20.22 ± 0.76 <sup>b</sup>  |
| Arg                       | 35.69 ± 0.88 <sup>d</sup>  | 23.03 ± 0.57 <sup>e</sup>  | 72.71 ± 1.79 <sup>a</sup>   | 41.47 ± 1.02 <sup>c</sup>  | 45.38 ± 1.12 <sup>b</sup>   | 34.33 ± 0.84 <sup>d</sup>  |
| Pro                       | 14.39 ± 0.73 <sup>d</sup>  | 18.33 ± 0.93 <sup>c</sup>  | 20.68 ± 1.05 <sup>c</sup>   | 25.78 ± 1.31 <sup>b</sup>  | 32.20 ± 1.64 <sup>a</sup>   | 24.04 ± 1.22 <sup>b</sup>  |
| Total                     | 190.22 ± 5.16 <sup>d</sup> | 161.19 ± 4.35 <sup>e</sup> | 557.14 ± 14.72 <sup>a</sup> | 311.49 ± 8.16 <sup>c</sup> | 425.56 ± 11.29 <sup>b</sup> | 295.31 ± 8.03 <sup>c</sup> |
| Digested (D) Pinsa Romana |                            |                            |                             |                            |                             |                            |
|                           | D-PR_24                    | D-PR_48                    | D-PR_48(SD)                 | D-PR_48+SD                 | D-PR_72                     | D-PR_RT                    |
| Asp                       | 12.06 ± 3.14 <sup>b</sup>  | 11.94 ± 1.04 <sup>b</sup>  | 22.56 ± 0.89 <sup>a</sup>   | 22.48 ± 0.66 <sup>a</sup>  | 20.68 ± 2.25 <sup>a</sup>   | 14.29 ± 2.11 <sup>b</sup>  |
| Thr                       | 32.32 ± 3.13 <sup>c</sup>  | 32.29 ± 4.64 <sup>c</sup>  | 56.41 ± 0.90 <sup>a</sup>   | 51.77 ± 3.95 <sup>ab</sup> | 47.14 ± 3.00 <sup>b</sup>   | 36.49 ± 2.22 <sup>c</sup>  |
| Ser                       | 40.29 ± 1.63 <sup>d</sup>  | 38.38 ± 4.87 <sup>d</sup>  | 76.15 ± 0.61 <sup>a</sup>   | 64.69 ± 7.58 <sup>ab</sup> | 59.37 ± 4.54 <sup>bc</sup>  | 47.10 ± 4.59 <sup>cd</sup> |
| Glu                       | 46.02 ± 4.91 <sup>d</sup>  | 47.79 ± 6.29 <sup>cd</sup> | 97.97 ± 0.99 <sup>a</sup>   | 78.01 ± 5.59 <sup>b</sup>  | 74.41 ± 2.77 <sup>b</sup>   | 59.30 ± 4.73 <sup>c</sup>  |
| Gly                       | 15.31 ± 0.38 <sup>c</sup>  | 15.58 ± 2.12 <sup>c</sup>  | 27.81 ± 0.33 <sup>a</sup>   | 24.84 ± 2.89 <sup>a</sup>  | 22.94 ± 1.74 <sup>ab</sup>  | 18.40 ± 1.63 <sup>bc</sup> |
| Ala                       | 44.12 ± 4.00 <sup>c</sup>  | 46.64 ± 5.96 <sup>c</sup>  | 72.72 ± 3.30 <sup>a</sup>   | 70.19 ± 6.89 <sup>a</sup>  | 61.27 ± 3.73 <sup>ab</sup>  | 48.93 ± 2.50 <sup>bc</sup> |
| Val                       | 58.25 ± 4.47 <sup>c</sup>  | 61.91 ± 7.06 <sup>c</sup>  | 98.88 ± 4.74 <sup>a</sup>   | 93.85 ± 7.67 <sup>ab</sup> | 83.70 ± 3.45 <sup>b</sup>   | 64.12 ± 3.74 <sup>c</sup>  |
| Cys                       | 16.86 ± 0.49 <sup>c</sup>  | 19.20 ± 3.74 <sup>bc</sup> | 33.94 ± 2.15 <sup>a</sup>   | 35.04 ± 1.30 <sup>a</sup>  | 33.17 ± 0.38 <sup>a</sup>   | 23.51 ± 2.97 <sup>b</sup>  |
| Met                       | 20.70 ± 2.81 <sup>c</sup>  | 23.78 ± 3.14 <sup>bc</sup> | 34.23 ± 3.13 <sup>a</sup>   | 34.96 ± 1.02 <sup>a</sup>  | 29.88 ± 0.49 <sup>ab</sup>  | 22.05 ± 0.95 <sup>c</sup>  |

**Table S3. Cont.**

|       | D-PR_24                     | D-PR_48                      | D-PR_48(SD)                  | D-PR_48+SD                   | D-PR_72                      | D-PR_RT                     |
|-------|-----------------------------|------------------------------|------------------------------|------------------------------|------------------------------|-----------------------------|
| Ile   | 53.02 ± 3.24 <sup>c</sup>   | 54.20 ± 6.89 <sup>c</sup>    | 87.40 ± 3.51 <sup>a</sup>    | 81.57 ± 7.22 <sup>ab</sup>   | 72.89 ± 2.33 <sup>b</sup>    | 57.61 ± 2.38 <sup>c</sup>   |
| Leu   | 105.81 ± 9.30 <sup>c</sup>  | 116.11 ± 16.98 <sup>bc</sup> | 158.83 ± 7.84 <sup>a</sup>   | 155.39 ± 12.14 <sup>a</sup>  | 137.75 ± 1.38 <sup>ab</sup>  | 111.67 ± 0.01 <sup>bc</sup> |
| Tyr   | 67.14 ± 6.32 <sup>c</sup>   | 76.50 ± 10.40 <sup>bc</sup>  | 107.24 ± 6.75 <sup>a</sup>   | 104.90 ± 5.77 <sup>a</sup>   | 92.52 ± 0.69 <sup>ab</sup>   | 72.59 ± 0.03 <sup>c</sup>   |
| Phe   | 70.86 ± 9.15 <sup>c</sup>   | 78.96 ± 10.90 <sup>bc</sup>  | 109.01 ± 6.54 <sup>a</sup>   | 109.95 ± 4.00 <sup>a</sup>   | 96.69 ± 0.01 <sup>ab</sup>   | 74.39 ± 0.63 <sup>c</sup>   |
| GABA  | 1.63 ± 0.71 <sup>a</sup>    | 2.25 ± 0.30 <sup>a</sup>     | 3.06 ± 0.71 <sup>a</sup>     | 2.26 ± 1.45 <sup>a</sup>     | 2.78 ± 0.01 <sup>a</sup>     | 1.08 ± 0.30 <sup>a</sup>    |
| Orn   | 0.69 ± 0.04 <sup>c</sup>    | 1.57 ± 0.33 <sup>ab</sup>    | 2.19 ± 0.03 <sup>a</sup>     | 2.00 ± 0.25 <sup>ab</sup>    | 1.39 ± 0.42 <sup>b</sup>     | 1.52 ± 0.12 <sup>ab</sup>   |
| Lys   | 49.28 ± 4.94 <sup>d</sup>   | 50.75 ± 5.88 <sup>d</sup>    | 77.37 ± 4.84 <sup>a</sup>    | 75.07 ± 4.26 <sup>ab</sup>   | 64.49 ± 0.42 <sup>bc</sup>   | 53.17 ± 1.55 <sup>cd</sup>  |
| His   | 25.18 ± 2.06 <sup>c</sup>   | 26.44 ± 3.27 <sup>c</sup>    | 42.61 ± 2.09 <sup>a</sup>    | 39.48 ± 2.30 <sup>a</sup>    | 33.75 ± 0.81 <sup>b</sup>    | 27.68 ± 0.86 <sup>c</sup>   |
| Trp   | 26.79 ± 3.00 <sup>c</sup>   | 27.07 ± 3.28 <sup>c</sup>    | 41.59 ± 2.37 <sup>a</sup>    | 40.51 ± 2.42 <sup>ab</sup>   | 35.19 ± 0.44 <sup>b</sup>    | 27.01 ± 0.80 <sup>c</sup>   |
| Arg   | 72.52 ± 8.88 <sup>c</sup>   | 81.11 ± 9.47 <sup>bc</sup>   | 114.04 ± 7.43 <sup>a</sup>   | 112.21 ± 4.07 <sup>a</sup>   | 92.06 ± 1.05 <sup>b</sup>    | 75.45 ± 0.12 <sup>bc</sup>  |
| Pro   | 4.53 ± 0.13 <sup>d</sup>    | 4.42 ± 0.29 <sup>d</sup>     | 11.31 ± 0.97 <sup>a</sup>    | 6.71 ± 0.33 <sup>b</sup>     | 6.07 ± 0.47 <sup>bc</sup>    | 4.95 ± 0.43 <sup>cd</sup>   |
| Total | 763.38 ± 71.96 <sup>c</sup> | 816.89 ± 110.84 <sup>c</sup> | 1275.30 ± 51.92 <sup>a</sup> | 1205.88 ± 81.57 <sup>a</sup> | 1068.14 ± 26.98 <sup>b</sup> | 841.31 ± 32.30 <sup>c</sup> |

Values in the same row with different superscript letters differ significantly ( $p < 0.05$ ) based on one-way ANOVA (Tuckey-Kramer).

The data are the means of three independent analysis ± standard deviations (n =3). PR\_24, Pinsa Romana made with biga fermented for 24 h with baker's yeast; PR\_48, Pinsa Romana made with biga fermented for 48 h with baker's yeast; PR\_72, Pinsa Romana made with biga fermented for 72 h with baker's yeast; PR\_48(SD), Pinsa Romana made with biga fermented for 48 h with baker's yeast and

sourdough; PR\_48+SD, Pinsa Romana made with biga fermented for 48 h with baker's yeast, and including sourdough in the final dough. PR\_RT, Pinsa Romana made without biga and sourdough (reference thesis).
